# Supplementary material for: Genomic Organization and Evolution of the Trace Amine-Associated Receptor (TAAR) Repertoire in Atlantic Salmon (Salmo salar)
Source: PubMed Central journal article supplement (PMC4065256; doi:10.1534/g3.114.010660), 2014-04-22
Supplement: supp_g3.114.010660_010660SI.pdf [file supp_g3.114.010660_010660SI.pdf]

**Genomic Organization and Evolution of the Trace Amine-Associated Receptor (TAAR) Repertoire in Atlantic Salmon (*Salmo salar*)**

Jordan A. Tessarolo,<sup>1</sup> Mohammad J. Tabesh,<sup>1</sup> Michael Nesbitt,<sup>1</sup> and William S. Davidson<sup>\*1</sup>

<sup>1</sup>Department of Molecular Biology and Biochemistry, Simon Fraser University, Burnaby, BC, V5A 1S6 Canada

\*Corresponding author: E-mail: [w davidso@sfu.ca](mailto:w davidso@sfu.ca)

DOI: 10.1534/g3.114.010660

**Figure S1** MUSCLE alignment of full-length putatively functional Atlantic salmon TAAR amino acid sequences. Blue, pink, and red annotations below the consensus sequences denotes extracellular, intracellular, and transmembrane domains, respectively, as predicted by TMHMM. The yellow annotation above the consensus sequences marks the TAAR fingerprint motif. Brown annotations below residues within the alignment are binding site residues predicted by RaptorX-binding.

Available for download as a PDF file at <http://www.g3journal.org/lookup/suppl/doi:10.1534/g3.114.010660/-/DC1>

### Files S1-S3

Available for download at <http://www.g3journal.org/lookup/suppl/doi:10.1534/g3.114.010660/-/DC1>

**File S1** All amino acid sequences used for analyses displayed in FASTA format.

**File S2** FASTA file containing trimmed MUSCLE alignment of 246 full-length putatively functional TAAR amino acid sequences from ten vertebrate species. This alignment was used for the Bayesian tree displayed in Figure 1.

**File S3** FASTA file containing MUSCLE alignment of 27 full-length putatively functional Atlantic salmon TAAR amino acid sequences. This alignment was used for the Bayesian tree displayed in Figure 2.

**Table S1 Summary of markers used for mapping including their name, source and physical/genetic location.** The details concerning primers and amplification conditions can be found at [www.AsalBase.org](http://www.AsalBase.org).

| Marker Name  | Marker Source | Physical Location | Genetic Location |
|--------------|---------------|-------------------|------------------|
| Ssa0907BSFU  | S0152B01_SP6  | fps798            | Ssa15            |
| Ssa1303BSFU  | S0159E20_SP6  | fps508            | Ssa21            |
| Ssa0975BSFU  | S0085J07_SP6  | fps943            | Ssa21            |
| Ssa0043BSFU  | S0322O19_T7   | fps2319           | Ssa06            |
| Ssa0014SCSFU | AGKD01073835  | fps943            | Ssa21            |
| Ssa0017SCSFU | AGKD01014617  | unmapped          | Ssa21            |
| Ssa0019SCSFU | AGKD01073505  | unmapped          | Ssa14            |

**Table S2** Accession numbers and genomic positions for vertebrate genes used in analyses.

| Organism                             | Gene Name          | Genomic Position       | Accession Number      | Source                |
|--------------------------------------|--------------------|------------------------|-----------------------|-----------------------|
| Chicken<br><i>Gallus gallus</i>      | Gg_TAAR1           | 3:56100482..56108943   | XM_004935740.1        | NCBI                  |
|                                      | Gg_TAAR2           | 3:56116829..56117857   | XM_003640968.1        | NCBI                  |
|                                      | Gg_TAAR5           | 3:56137725..56138753   | XM_001231564.2        | NCBI                  |
| Human<br><i>Homo sapiens</i>         | Hs_TAAR6           | 6:132891461..132892498 | NM_175067.1           | NCBI                  |
|                                      | Hs_TAAR1           | 6:132966123..132967142 | NM_138327             | NCBI                  |
|                                      | Hs_TAAR2v1         | 6:132938289..132945414 | NM_001033080.1        | NCBI                  |
|                                      | Hs_TAAR2v2         | 6:132938289..132945414 | NM_014626.3           | NCBI                  |
|                                      | Hs_TAAR5           | 6:132909731..132910877 | NM_003967.2           | NCBI                  |
|                                      | Hs_TAAR8           | 6:132873832..132874860 | NM_053278.1           | NCBI                  |
|                                      | Hs_TAAR9           | 6:132859427..132860475 | NM_175057.3           | NCBI                  |
| Lamprey<br><i>Petromyzon marinus</i> | STIG_44993.TAAR325 |                        |                       | Libants et al. (2009) |
|                                      | STIG_38630.TAAR335 |                        |                       | Libants et al. (2009) |
|                                      | STIG_28657.TAAR352 |                        |                       | Libants et al. (2009) |
|                                      | STIG_22166.TAAR354 |                        |                       | Libants et al. (2009) |
|                                      | STIG_17331.TAAR351 |                        |                       | Libants et al. (2009) |
|                                      | STIG_16230.TAAR353 |                        |                       | Libants et al. (2009) |
|                                      | STIG_15712.TAAR345 |                        |                       | Libants et al. (2009) |
|                                      | STIG_15153.TAAR369 |                        |                       | Libants et al. (2009) |
|                                      | STIG_15153.TAAR353 |                        |                       | Libants et al. (2009) |
|                                      | STIG_14718.TAAR353 |                        |                       | Libants et al. (2009) |
|                                      | STIG_14718.TAAR345 |                        |                       | Libants et al. (2009) |
|                                      | STIG_14409.TAAR352 |                        |                       | Libants et al. (2009) |
|                                      | STIG_12707.TAAR348 |                        |                       | Libants et al. (2009) |
|                                      | STIG_9755.TAAR355B |                        |                       | Libants et al. (2009) |
|                                      | STIG_9755.TAAR355A |                        |                       | Libants et al. (2009) |
|                                      | STIG_9665.TAAR351  |                        |                       | Libants et al. (2009) |
|                                      | STIG_7446.TAAR346  |                        |                       | Libants et al. (2009) |
|                                      | STIG_6636.TAAR354  |                        |                       | Libants et al. (2009) |
|                                      | STIG_5267.TAAR362  |                        |                       | Libants et al. (2009) |
|                                      | STIG_3721.TAAR365  |                        |                       | Libants et al. (2009) |
|                                      | STIG_3721.TAAR351B |                        |                       | Libants et al. (2009) |
|                                      | STIG_3721.TAAR351A |                        |                       | Libants et al. (2009) |
|                                      | STIG_2594.TAAR358  |                        |                       | Libants et al. (2009) |
| STIG_2594.TAAR349                    |                    |                        | Libants et al. (2009) |                       |
| STIG_2594.TAAR340                    |                    |                        | Libants et al. (2009) |                       |
| STIG_1853.TAAR349B                   |                    |                        | Libants et al. (2009) |                       |
| STIG_1853.TAAR349A                   |                    |                        | Libants et al. (2009) |                       |
| Mouse<br><i>Mus musculus</i>         | Mm_TAAR1           | 10:23920406..23921404  | NM_053205.1           | NCBI                  |
|                                      | Mm_TAAR2           | 10:23938572..23941583  | NM_001007266.1        | NCBI                  |

|                                          |                              |                               |                 |      |
|------------------------------------------|------------------------------|-------------------------------|-----------------|------|
|                                          | Mm_TAAR3                     | 10:23949558..23950589         | NM_001008429.1  | NCBI |
|                                          | Mm_TAAR4                     | 10:23960494..23961537         | NM_001008499.1  | NCBI |
|                                          | Mm_TAAR5                     | 10:23970706..23971719         | NM_001009574.1  | NCBI |
|                                          | Mm_TAAR6                     | 10:23984609..23985646         | NM_001010828.1  | NCBI |
|                                          | Mm_TAAR7a                    | 10:23992405..23993481         | NM_001010829.1  | NCBI |
|                                          | Mm_TAAR7b                    | 10:23999939..24001015         | NM_001010827.1  | NCBI |
|                                          | Mm_TAAR7d                    | 10:24027222..24028298         | NM_001010838.1  | NCBI |
|                                          | Mm_TAAR7e                    | 10:24037614..24038690         | NM_001010835.1  | NCBI |
|                                          | Mm_TAAR7f                    | 10:24049510..24050586         | NM_001010839.1  | NCBI |
|                                          | Mm_TAAR8a                    | 10:24076500..24077534         | NM_001010830.1  | NCBI |
|                                          | Mm_TAAR8b                    | 10:24091260..24092294         | NM_001010837.1  | NCBI |
|                                          | Mm_TAAR8c                    | 10:24100843..24101951         | NM_001010840.2  | NCBI |
|                                          | Mm_TAAR9                     | 10:24108488..24109534         | NM_001010831.1  | NCBI |
| <b>Fugu</b><br><i>Takifugu rubripes</i>  | Tr_TAAR1-like LOC101065853   | scaffold_144:4873..5868       | XM_003976993.1  | NCBI |
|                                          | Tr_TAAR1-like LOC101068509   | scaffold_2286:2698:3676       | NW_004072942.1  | NCBI |
|                                          | Tr_TAAR1-like LOC101075198   | scaffold_229:4033..5025       | XM_003977307.1  | NCBI |
|                                          | Tr_TAAR1-like LOC101075670   | 8:5604511..5605530            | XM_003966556.1  | NCBI |
|                                          | Tr_TAAR1-like LOC101076453   | scaffold_682:7142..8143       | XM003976898.1   | NCBI |
|                                          | Tr_TAAR1-like LOC101076685   | scaffold_682:15010..15984     | XM_003976899.1  | NCBI |
| <b>Medaka</b><br><i>Oryzias latipes</i>  | Ol_TAAR 7e-like LOC101169023 | 2:26340511..26341482          | XM_004066738.1  | NCBI |
|                                          | Ol_TAAR 1-like LOC101174969  | 24:10154632..10155600         | XM_004083634.1  | NCBI |
|                                          | Ol_TAAR 1-like LOC101174242  | 24:10050386..10051363         | XM_004083631.1  | NCBI |
|                                          | Ol_TAAR1-like LOC101163058   | Un:2521..3516                 | XM_004085890.1  | NCBI |
|                                          | Ol_TAAR 1-like LOC101175700  | 24:10183943..10184941         | XM_0040083637.1 | NCBI |
|                                          | Ol_TAAR 1-like LOC101175452  | 24:10173586..10174675         | NC_019882.1     | NCBI |
| <b>Frog</b><br><i>Xenopus tropicalis</i> | Xt_TAAR1                     | scaffold_5:56592878..56593941 | XM_002935811.2  | NCBI |
|                                          | Xt_TAAR4-like LOC100497949   | scaffold_5:61512858..61513896 | NW_004668237.1  | NCBI |
|                                          | Xt_TAAR4-like LOC100488258   | scaffold_5:56562660..56563662 | NW_004668237.1  | NCBI |
|                                          | Xt_TAAR4-like LOC100487949   | scaffold_5:56584949..56585950 | XM_002935812.2  | NCBI |
|                                          | Xt_TAAR4-like LOC100488107   | scaffold_2751:3356..4363      | XM_002935813.1  | NCBI |
|                                          | Xt_TAAR4-like LOC100485003   | scaffold_5:56571031..56572038 | XM004914870.1   | NCBI |
| <b>Zebrafish</b><br><i>Danio rerio</i>   | Dr_TAAR1b                    | 20:46197103..46198102         | NM_001082904.1  | NCBI |
|                                          | Dr_TAAR10a                   | 20:46166706..46167717         | NM_001082898.1  | NCBI |
|                                          | Dr_TAAR10b                   | 20:46187583..46188593         | NM_001082903.1  | NCBI |
|                                          | Dr_TAAR10c                   | 20:46170540..46171551         | NM_001082900.1  | NCBI |
|                                          | Dr_TAAR10d                   | 20:46178797..46179975         | NM_001082902    | NCBI |
|                                          | Dr_TAAR11                    | 20:46192811..46193795         | NM_001083077.1  | NCBI |
|                                          | Dr_TAAR12a                   | 20:46239853..46240885         | NM_001083109.1  | NCBI |
|                                          | Dr_TAAR12b                   | 20:46224045..46225059         | NM_001083104.1  | NCBI |
|                                          | Dr_TAAR12c                   | 20:46220574..46221591         | NM_001083095.1  | NCBI |
|                                          | Dr_TAAR12e                   | 20:46264043..46265058         | NM_001083094.1  | NCBI |

|            |                       |                |      |
|------------|-----------------------|----------------|------|
| Dr_TAAR12f | 20:46250999..46252013 | NM_001082907.1 | NCBI |
| Dr_TAAR12g | 20:46256084..46257095 | NM_001082908.1 | NCBI |
| Dr_TAAR12h | 20:46271973..46273008 | NM_001082909.1 | NCBI |
| Dr_TAAR12i | 20:46211225..46212248 | NM_001083085.1 | NCBI |
| Dr_TAAR12j | 20:46278935..46279958 | NM_001082911.1 | NCBI |
| Dr_TAAR13b | 20:46141163..46142188 | NM_001083042.1 | NCBI |
| Dr_TAAR13c | 20:46122478..46123505 | NM_001083040.1 | NCBI |
| Dr_TAAR13d | 20:46133038..46134063 | NM_001083041.1 | NCBI |
| Dr_TAAR13e | 20:46152019..46153044 | NM_001083043.1 | NCBI |
| Dr_TAAR14a | 20:46087730..46088693 | NM_001083036.1 | NCBI |
| Dr_TAAR14b | 20:46555069..46556055 | NM_001082884.1 | NCBI |
| Dr_TAAR14d | 20:46542282..46543268 | NM_001082912.1 | NCBI |
| Dr_TAAR14e | 20:46520053..46521039 | NM_001082914.1 | NCBI |
| Dr_TAAR14f | 20:46537214..46538200 | NM_001082913.1 | NCBI |
| Dr_TAAR14h | 20:46073613..46074577 | NM_001083093.1 | NCBI |
| Dr_TAAR14i | 20:46069677..46070637 | NM_001083037.1 | NCBI |
| Dr_TAAR14j | 20:46064040..46065004 | NM_001083076.1 | NCBI |
| Dr_TAAR14l | 20:46079286..46080243 | NM_001083103.1 | NCBI |
| Dr_TAAR15  | 20:46117709..46118695 | NM_001083039.1 | NCBI |
| Dr_TAAR16a | 10:41959548..41960522 | NC_007121.5    | NCBI |
| Dr_TAAR16f | 10:41977904..41978899 | NC_007121.5    | NCBI |
| Dr_TAAR16g | 10:41982677..41983672 | NC_007121.5    | NCBI |
| Dr_TAAR17a | 10:41964902..41965909 | XM_002663646.2 | NCBI |
| Dr_TAAR18a | 10:41889815..41890881 | XM_001921119.3 | NCBI |
| Dr_TAAR18c | 10:41918143..41919165 | XM_002663638.2 | NCBI |
| Dr_TAAR18d | 10:41897228..41898286 | NC_007121.5    | NCBI |
| Dr_TAAR18g | 10:41894347..41895340 | NC_007121.5    | NCBI |
| Dr_TAAR18h | 10:41927773..41929222 | XM_002663640.3 | NCBI |
| Dr_TAAR18i | 10:41934817..41935885 | NC_007121.5    | NCBI |
| Dr_TAAR18j | 10:41950041..41951072 | XM_002663643.2 | NCBI |
| Dr_TAAR19a | 10:42103621..42104682 | NC_007121.5    | NCBI |
| Dr_TAAR19b | 10:42140351..42141356 | NC_007121.5    | NCBI |
| Dr_TAAR19c | 10:42147157..42148218 | NC_007121.5    | NCBI |
| Dr_TAAR19d | 10:42134308..42135369 | XM_001921481.1 | NCBI |
| Dr_TAAR19e | 10:42108791..42109853 | NC_007121.5    | NCBI |
| Dr_TAAR19h | 10:42050839..42051900 | NC_007121.5    | NCBI |
| Dr_TAAR19i | 10:42097939..42099000 | NC_007121.5    | NCBI |
| Dr_TAAR19j | 10:42092480..42093541 | NC_007121.5    | NCBI |
| Dr_TAAR19m | 10:42056442..42057541 | XM_001342973.2 | NCBI |
| Dr_TAAR19n | 10:42066521..42067570 | NC_007121.5    | NCBI |
| Dr_TAAR19o | 10:42043558..42044629 | NC_007121.5    | NCBI |

|                             |                       |                |      |
|-----------------------------|-----------------------|----------------|------|
| Dr_TAAR19p                  | 10:42036952..42038710 | NM_001199914.1 | NCBI |
| Dr_TAAR19q                  | 10:42088337..42089398 | NC_007121.5    | NCBI |
| Dr_TAAR19s                  | 10:42012869..42013930 | NC_007121.5    | NCBI |
| Dr_TAAR19t                  | 10:42008622..42009707 | NC_007121.5    | NCBI |
| Dr_TAAR19u                  | 10:42031263..42032312 | NC_007121.5    | NCBI |
| Dr_TAAR1-like LOC100535889  | Un:6229..7240         | NW_003336689.1 | NCBI |
| Dr_TAAR20a                  | 10:41698366..41699456 | XM_001920656.2 | NCBI |
| Dr_TAAR20a1                 | 10:41839705..41840724 | XM_002663628.2 | NCBI |
| Dr_TAAR20b                  | 10:41704278..41705383 | XM_001920673.2 | NCBI |
| Dr_TAAR20b1                 | 10:41827971..41829023 | NC_007121.5    | NCBI |
| Dr_TAAR20c                  | Un:42..1040           | BC107613.1     | NCBI |
| Dr_TAAR20c1                 | 10:41747212..41748268 | NC_007121.5    | NCBI |
| Dr_TAAR20d1                 | 10:41845015..41846010 | XM_002663629.2 | NCBI |
| Dr_TAAR20f                  | 10:41717303..41718355 | NC_007121.5    | NCBI |
| Dr_TAAR20g                  | 10:41725305..41748271 | NC_007121.5    | NCBI |
| Dr_TAAR20h                  | 10:41713185..41714183 | XM_001341553.2 | NCBI |
| Dr_TAAR20i                  | 10:41731447..41732457 | XM_001920721.2 | NCBI |
| Dr_TAAR20n                  | 10:41775937..41776989 | NC_007121.5    | NCBI |
| Dr_TAAR20o                  | 10:41819593..41820646 | NC_007121.5    | NCBI |
| Dr_TAAR20r                  | 10:41790993..41792046 | NC_007121.5    | NCBI |
| Dr_TAAR20u                  | 10:41762407..41763433 | XM_001920788.2 | NCBI |
| Dr_TAAR20v                  | 10:41808799..41809851 | NC_007121.5    | NCBI |
| Dr_TAAR20z                  | 10:41849611..41850663 | NC_007121.5    | NCBI |
| Dr_TAAR32                   | 10:41995697..41996758 | NC_007121.5    | NCBI |
| Dr_TAAR4-like LOC100150578  | 15:2040432..2041457   | XM_001920809.1 | NCBI |
| Dr_TAAR64                   | 20:46148101..46149128 | NM_001083102.1 | NCBI |
| Dr_TAAR6-like LOC100002481  | 10:41834498..41835523 | XM_001342220.1 | NCBI |
| Dr_TAAR6-like LOC100002609  | 10:41902807..41903800 | NC_007121.5    | NCBI |
| Dr_TAAR6-like LOC100147966  | 10:42018541..42019952 | NC_007121.5    | NCBI |
| Dr_TAAR6-like LOC100147986  | 10:41790674..41791673 | NC_007121.5    | NCBI |
| Dr_TAAR9-like LOC101887086  | 10:41813764..41814763 | NC_007121.5    | NCBI |
| Dr_TAAR6-like LOC100150393  | 10:41856629..41857625 | NC_007121.5    | NCBI |
| Dr_TAAR6-like LOC100151046  | 10:42024091..42025099 | NC_007121.5    | NCBI |
| Dr_TAAR6-like LOC100330759  | 10:41910376..41911369 | NC_007121.5    | NCBI |
| Dr_TAAR6-like LOC100332495  | 13:305976..306950     | NC_007124.5    | NCBI |
| Dr_TAAR7a-like LOC100150419 | 20:46084062..46085048 | NC_007131.5    | NCBI |
| Dr_TAAR7c-like LOC100331259 | 10:41954907..41955899 | NC_007121.5    | NCBI |
| Dr_TAAR7d-like LOC100537518 | 10:42026878..42027874 | NC_007121.5    | NCBI |
| Dr_TAAR9-like LOC100151309  | 10:41879380..41880718 | XM_002663633.2 | NCBI |
| Dr_TAAR3-like LOC100331742  | Un:10804..11790       | NW_003336289.1 | NCBI |
| Dr_TAAR2-like               | 20:Un:4860..5573      | XM_001923755.4 | NCBI |



|                                   |                             |                           |                     |         |
|-----------------------------------|-----------------------------|---------------------------|---------------------|---------|
|                                   | Dr_TAAR20t                  | 10:41767963..41769009     | XM_002663626.3      | NCBI    |
|                                   | Dr_TAAR20l                  | 10:41771445..41772441     | XM_005155417.1      | NCBI    |
|                                   | Dr_TAAR1-like LOC100148217  | 10:41873631..41874632     | NC_007121.5         | NCBI    |
|                                   | TAAR 6-like LOC100148961    | 10:41868500..41869496     | XM_001921070.3      | NCBI    |
|                                   | Dr_TAAR20j                  | 10:41781192..41782185     | XM_002663627.2      | NCBI    |
|                                   | TAAR 6-like LOC100149676    | 10:41864180..41865170     | NC_007121.5         | NCBI    |
|                                   | Dr_TAAR18b                  | 10:41922296..41923295     | XM_002663639.2      | NCBI    |
|                                   | TAAR 9-like LOC100148476    | 10:41973844..41974831     | NC_007121.5         | NCBI    |
|                                   | Dr_TAAR6-like LOC100332366  | 13:295967..296969         | NC_007124.5         | NCBI    |
|                                   | Dr_TAAR9-like LOC100000110  | 13:300938..301940         | NC_007124.5         | NCBI    |
| <b>Tetraodon</b>                  | Tn_TAAR1(6 of 15)           | Un:85474851..85475831     | ENSTNIT00000003225  | Ensembl |
| <i>Tetraodon nigroviridis</i>     | Tn_TAAR1(11 of 15)          | Un:85467788..85468786     | ENSTNIT00000002494  | Ensembl |
|                                   | Tn_TAAR1(14 of 15)          | Un:35318087..35319082     | ENSTNIT00000001436  | Ensembl |
|                                   | Tn_TAAR1(13 of 15)          | Un:70258269..70259261     | ENSTNIT00000007318  | Ensembl |
|                                   | Tn_TAAR1(15 of 15)          | Un:70265697..70266692     | ENSTNIT00000007319  | Ensembl |
|                                   | Tn_TAAR1(10 of 15)          | Un: 85499769..85500764    | ENSTNIT00000008083  | Ensembl |
|                                   | Tn_TAAR1(12 of 15)          | 14:1075051..1076047       | ENSTNIG00000001506  | Ensembl |
|                                   | Tn_TAAR1(5 of 15)           | 14:1025315..1026317       | ENSTNIG000000019179 | Ensembl |
|                                   | Tn_TAAR1(2 of 15)           | 14:1062370..1063270       | ENSTNIG00000001657  | Ensembl |
|                                   | Tn_TAAR1(3 of 15)           | 14:1072819..1073800       | ENSTNIG00000001360  | Ensembl |
|                                   | Tn_TAAR1(9 of 15)           | Un:85495812..85496808     | ENSTNIG00000005193  | Ensembl |
| <b>Stickleback</b>                | Ga_TAAR1(2 of 5)            | groupXVIII:864898..865894 | ENSGACG00000004284  | Ensembl |
| <i>Gasterosteus aculeatus</i>     | Ga_TAAR1(5 of 5)            | groupXVIII:849379..850381 | ENSGACG00000004279  | Ensembl |
|                                   | Ga_TAAR1(1 of 5)            | groupXVIII:856337..857339 | ENSGACG00000004280  | Ensembl |
|                                   | Ga_TAAR1(4 of 5)            | groupXVIII:806425..807427 | ENSGACG00000004274  | Ensembl |
|                                   | Ga_TAAR1(3 of 5)            | groupI:27258528..2725921  | ENSGACG000000015361 | Ensembl |
| <b>Anole Lizard</b>               | Ac_TAAR1                    | Un:4463430..4464437       | XM_003223314.1      | NCBI    |
| <i>Anolis carolinensis</i>        | Ac_TAAR2                    | Un:4474066..4475097       | XM_003223315.1      | NCBI    |
|                                   | Ac_TAAR5                    | Un:4484212..4485264       | XM_003223316.1      | NCBI    |
| <b>American Alligator</b>         | Am_TAAR1                    | Un:220473..221480         | XM_006270537.1      | NCBI    |
| <i>Alligator mississippiensis</i> | Am_TAAR2                    | 245497..246489            | XM_006270538.1      | NCBI    |
|                                   | Am_TAAR4-like LOC102559019  | 286493..287536            | XM_006270529.1      | NCBI    |
|                                   | Am_TAAR4-like LOC102558785  | 269855..270901            | XM_006270528.1      | NCBI    |
|                                   | Am_TAAR5-like LOC102561336  | 297408..298403            | XM_006270539.1      | NCBI    |
|                                   | Am_TAAR7a-like LOC102561788 | 335295..336326            | XM_006270540.1      | NCBI    |
|                                   | Am_TAAR9-like LOC102562260  | 358195..359220            | XM_006270542.1      | NCBI    |
|                                   | Am_TAAR9-like LOC102559257  | 305709..306737            | XM_006270530.1      | NCBI    |
| <b>African Coelacanth</b>         | Lc_TAAR4-like LOC102365654  | Un:7900..8919             | XM_006014231.1      | NCBI    |
| <i>Latimeria chalumnae</i>        | Lc_TAAR4-like LOC102362127  | Un:6731..7825             | XM_006014219.1      | NCBI    |
|                                   | Lc_TAAR9-like LOC102346275  | Un:226..1260              | XM_006014034.1      | NCBI    |
|                                   | Lc_TAAR4-like LOC102346012  | Un:4621..5655             | XM_006014033.1      | NCBI    |

|                            |                                   |                   |                |               |
|----------------------------|-----------------------------------|-------------------|----------------|---------------|
|                            | Lc_TAAR4-like LOC102362844        | Un:16272..17312   | XM_006014013.1 | NCBI          |
|                            | Lc_TAAR4-like LOC102358308        | Un:34650..35687   | XM_006013795.1 | NCBI          |
|                            | Lc_TAAR4-like LOC102346983        | Un:43349..44395   | XM_006013765.1 | NCBI          |
|                            | Lc_TAAR4-like LOC102362653        | Un:81244..82287   | XM_006013513.1 | NCBI          |
|                            | Lc_TAAR5-like LOC102362390        | Un:53536..54543   | XM_006013512.1 | NCBI          |
|                            | Lc_TAAR4-like LOC102361509        | Un:24914..25954   | XM_006013443.1 | NCBI          |
|                            | Lc_TAAR4-like LOC102358939        | Un:98526..99563   | XM_006013436.1 | NCBI          |
|                            | Lc_TAAR4-like LOC102367115        | Un:100058..101794 | XM_006013007.1 | NCBI          |
|                            | Lc_TAAR4-like LOC102366851        | Un:54232..56373   | XM_006013006.1 | NCBI          |
|                            | Lc_TAAR4-like LOC102366590        | Un:17939..19252   | XM_006013005.1 | NCBI          |
|                            | Lc_TAAR4-like LOC102364694        | Un:107680..108717 | XM_006012998.1 | NCBI          |
|                            | Lc_TAAR5-like LOC102348717        | Un:134193..135206 | XM_006011945.1 | NCBI          |
|                            | Lc_TAAR5-like LOC102348210        | Un:47880..48881   | XM_006011943.1 | NCBI          |
|                            | Lc_TAAR1-like LOC102360536        | Un:202003..203031 | XM_006010896.1 | NCBI          |
| <b>Elephant Shark</b>      | Cm_contig_19181 - ORF 1 (frame 3) | Un:6852..7886     | AAVX02019181.1 | NCBI          |
| <i>Callorhinchus milii</i> | Cm_contig_19181 - ORF 4 (frame 1) | Un:46282..47310   | AAVX02019181.1 | NCBI          |
| <b>Atlantic Salmon</b>     |                                   | 21359..22306      | AGKD01000046   | ASalBase/NCBI |
| <i>Salmo salar</i>         |                                   | 16565..17527      | AGKD01000061   | ASalBase/NCBI |
|                            |                                   | 35874..36836      | AGKD01000272   | ASalBase/NCBI |
|                            |                                   | 6099..7052        | AGKD01000449   | ASalBase/NCBI |
|                            |                                   | 2040..3002        | AGKD01001626   | ASalBase/NCBI |
|                            |                                   | 16596..17558      | AGKD01003248   | ASalBase/NCBI |
|                            |                                   | 13148..14107      | AGKD01003637   | ASalBase/NCBI |
|                            |                                   | 9633..10595       | AGKD01004261   | ASalBase/NCBI |
|                            |                                   | 12524..13471      | AGKD01004637   | ASalBase/NCBI |
|                            |                                   | 7621..8583        | AGKD01006407   | ASalBase/NCBI |
|                            |                                   | 8332..9279        | AGKD01009924   | ASalBase/NCBI |
|                            |                                   | 9151..10113       | AGKD01016613   | ASalBase/NCBI |
|                            |                                   | 3006..3971        | AGKD01019372   | ASalBase/NCBI |
|                            |                                   | 15867..16829      | AGKD01020184   | ASalBase/NCBI |
|                            |                                   | 10125..11087      | AGKD01034652   | ASalBase/NCBI |
|                            |                                   | 859..1890         | AGKD01044192   | ASalBase/NCBI |
|                            |                                   | 796..1821         | AGKD01064135   | ASalBase/NCBI |
|                            |                                   | 1778..2743        | AGKD01072494   | ASalBase/NCBI |
|                            |                                   | 2586..3548        | AGKD01073835   | ASalBase/NCBI |
|                            |                                   | 3202..4164        | AGKD01081184   | ASalBase/NCBI |
|                            |                                   | 1874..2911        | AGKD01084249b  | ASalBase/NCBI |
|                            |                                   | 2433..3392        | AGKD01089915   | ASalBase/NCBI |
|                            |                                   | 2628..3659        | AGKD01103530   | ASalBase/NCBI |
|                            |                                   | 5286..6239        | AGKD01115415   | ASalBase/NCBI |
|                            |                                   | 717..1823         | AGKD01134375   | ASalBase/NCBI |
|                            |                                   | 9267..10224       | AGKD01195896*  | ASalBase/NCBI |

|                  |                                | 731..1693              | AGKD01495072   | ASaIBase/NCBI |
|------------------|--------------------------------|------------------------|----------------|---------------|
| <b>OUTGROUPS</b> | Dr_Histamine Receptor H2       | 14:1618017..1619248    | NM_001045338.1 | NCBI          |
|                  | Hs_Histamine Receptor H2       | 5:175084847..175136239 | NM_001131055.1 | NCBI          |
|                  | Hs_Rhodopsin                   | 3:129247482..129254187 | NM_000539.3    | NCBI          |
|                  | Dr_Adrenergic Receptor Beta 3a | 8:38812340..38850902   | NM_001128335.1 | NCBI          |
|                  | Hs_Adrenergic Receptor Beta 3  | 8:37820513..37824184   | NM_000025.2    | NCBI          |
|                  | Gg_Histamine Receptor H2       | 13:9783231..9794177    | XM_004944905.1 | NCBI          |
|                  | Dr_Dopamine receptor D2a       | 15:21008238..21035946  | NM_183068.1    | NCBI          |
|                  | Hs_Dopamine receptor D2        | 11:5001..70685         | NM_000795.3    | NCBI          |
|                  | Gg_Dopamine receptor D2        | 24:5748287..5753356    | NM_001113290.1 | NCBI          |
|                  | Dr_Serotonin receptor 1A b     | 21:19778036..19779277  | NM_001145766.1 | NCBI          |
|                  | Hs_Serotonin receptor 1A       | 5:63255560..63257804   | NM_000524.3    | NCBI          |
|                  | Gg_Serotonin receptor 1A       | Z:19853067..19854401   | NM_001170528.1 | NCBI          |

\*Contig with partial sequence. Complete TAAR was found in scaffold jcf2339333987\_2792921-4584714\_ssa21 (Lien et al., in preparation), which contains this contig

**Table S3 Summary of putatively functional Atlantic salmon TAAR genes including predicted nucleotide length and physical/genetic location.** Superscripts denote the various mapping methods utilized.

| Contig        | Length (bp) | Physical Location    | Genetic Location     |
|---------------|-------------|----------------------|----------------------|
| AGKD01000046  | 948         | unmapped             | unmapped             |
| AGKD01000061  | 963         | unmapped             | unmapped             |
| AGKD01000272  | 963         | unmapped             | unmapped             |
| AGKD01000449  | 954         | unmapped             | unmapped             |
| AGKD01001626  | 963         | fps943 <sup>1</sup>  | Ssa21 <sup>1,2</sup> |
| AGKD01003248  | 963         | fps508 <sup>1</sup>  | Ssa21 <sup>1</sup>   |
| AGKD01003637  | 960         | fps508 <sup>1</sup>  | Ssa21 <sup>1,2</sup> |
| AGKD01004261  | 963         | unmapped             | unmapped             |
| AGKD01004637  | 948         | unmapped             | Ssa13 <sup>2,3</sup> |
| AGKD01006407  | 963         | unmapped             | Ssa21 <sup>2</sup>   |
| AGKD01009924  | 948         | unmapped             | unmapped             |
| AGKD01016613  | 963         | fps508 <sup>1</sup>  | Ssa21 <sup>1,2</sup> |
| AGKD01019372  | 966         | unmapped             | Ssa21 <sup>2</sup>   |
| AGKD01020184  | 963         | fps508 <sup>1</sup>  | Ssa21 <sup>1,2</sup> |
| AGKD01034652  | 963         | unmapped             | unmapped             |
| AGKD01044192  | 1026        | fps2319 <sup>1</sup> | Ssa06 <sup>1,3</sup> |
| AGKD01064135  | 1026        | unmapped             | unmapped             |
| AGKD01072494  | 966         | unmapped             | Ssa02 <sup>2</sup>   |
| AGKD01073835  | 963         | fps943 <sup>1</sup>  | Ssa21 <sup>1,3</sup> |
| AGKD01081184  | 963         | fps508 <sup>1</sup>  | Ssa21 <sup>1,2</sup> |
| AGKD01084249b | 1038        | fps798 <sup>1</sup>  | Ssa15 <sup>1,2</sup> |
| AGKD01089915  | 960         | fps943 <sup>1</sup>  | Ssa21 <sup>1,3</sup> |
| AGKD01103530  | 1026        | unmapped             | unmapped             |
| AGKD01115415  | 954         | fps508 <sup>1</sup>  | Ssa21 <sup>1,2</sup> |
| AGKD01134375  | 1038        | fps798 <sup>1</sup>  | Ssa15 <sup>1,2</sup> |
| AGKD01195896  | 957         | fps508 <sup>1</sup>  | Ssa21 <sup>1</sup>   |
| AGKD01495072  | 963         | unmapped             | Unmapped             |

<sup>1</sup> BLASTn against BAC ends

<sup>2</sup> BLASTn against SNP mapped

<sup>3</sup> Microsatellite marker

**Table S4 Summary of putative Atlantic salmon TAAR pseudogenes including physical/genetic location and predicted cause of pseudogenization.** Superscripts denote the various mapping methods utilized.

| Name          | Physical Location   | Genetic Location     | Predicted Cause                         |
|---------------|---------------------|----------------------|-----------------------------------------|
| AGKD01001951  | fps508 <sup>1</sup> | Ssa21 <sup>1,2</sup> | Indel / Frameshift Mutation             |
| AGKD01036711  | fps508 <sup>1</sup> | Ssa21 <sup>1,2</sup> | Indel / Frameshift Mutation             |
| AGKD01087949  | fps508 <sup>1</sup> | Ssa21 <sup>1,2</sup> | Partial match                           |
| AGKD01040598  | fps798 <sup>1</sup> | Ssa15 <sup>1,2</sup> | Partial match                           |
| AGKD01084249a | fps798 <sup>1</sup> | Ssa15 <sup>1,2</sup> | Partial match                           |
| AGKD01222984  | fps798 <sup>1</sup> | Ssa15 <sup>1,2</sup> | Nonsense mutation                       |
| AGKD01000376  | unmapped            | unmapped             | Indel / Frameshift Mutation             |
| AGKD01014617  | unmapped            | Ssa21 <sup>2,3</sup> | Indel / Frameshift Mutation             |
| AGKD01024914  | unmapped            | unmapped             | Partial Match                           |
| AGKD01052335  | unmapped            | unmapped             | Nonsense Mutation                       |
| AGKD01073505  | unmapped            | Ssa14 <sup>3</sup>   | Indel / Frameshift Mutation             |
| AGKD01074920  | unmapped            | Ssa21 <sup>2</sup>   | Nonsense Mutation                       |
| AGKD01084072  | unmapped            | Ssa21 <sup>2</sup>   | Indel / Frameshift Mutation             |
| AGKD01085575  | unmapped            | unmapped             | Indel / Frameshift Mutation             |
| AGKD01102951  | unmapped            | unmapped             | more sequence data required             |
| AGKD01137574  | unmapped            | Ssa06 <sup>2</sup>   | Partial Match                           |
| AGKD01143659  | unmapped            | unmapped             | more sequence data required             |
| AGKD01145155  | unmapped            | unmapped             | more sequence data required             |
| AGKD01162248  | unmapped            | Ssa04 <sup>2</sup>   | Partial Match                           |
| AGKD01165582  | unmapped            | unmapped             | Frameshift Mutation / Nonsense Mutation |
| AGKD01284261  | unmapped            | Ssa01 <sup>2</sup>   | Partial Match                           |
| AGKD01437520  | unmapped            | Ssa21 <sup>2</sup>   | more sequence data required             |
| AGKD01455862  | unmapped            | Ssa21 <sup>2</sup>   | Indel / Frameshift Mutation             |
| AGKD01503373  | unmapped            | unmapped             | more sequence data required             |
| AGKD01507155  | unmapped            | unmapped             | Partial Match                           |

<sup>1</sup> BLASTn against BAC ends

<sup>2</sup> BLASTn against SNP mapped

<sup>3</sup> Microsatellite marker
