# Supplementary material for: Genomic Organization and Evolution of the Trace Amine-Associated Receptor (TAAR) Repertoire in Atlantic Salmon (Salmo salar)
Source: PubMed Central journal article supplement (PMC4065256; doi:10.1534/g3.114.010660), 2014-04-22

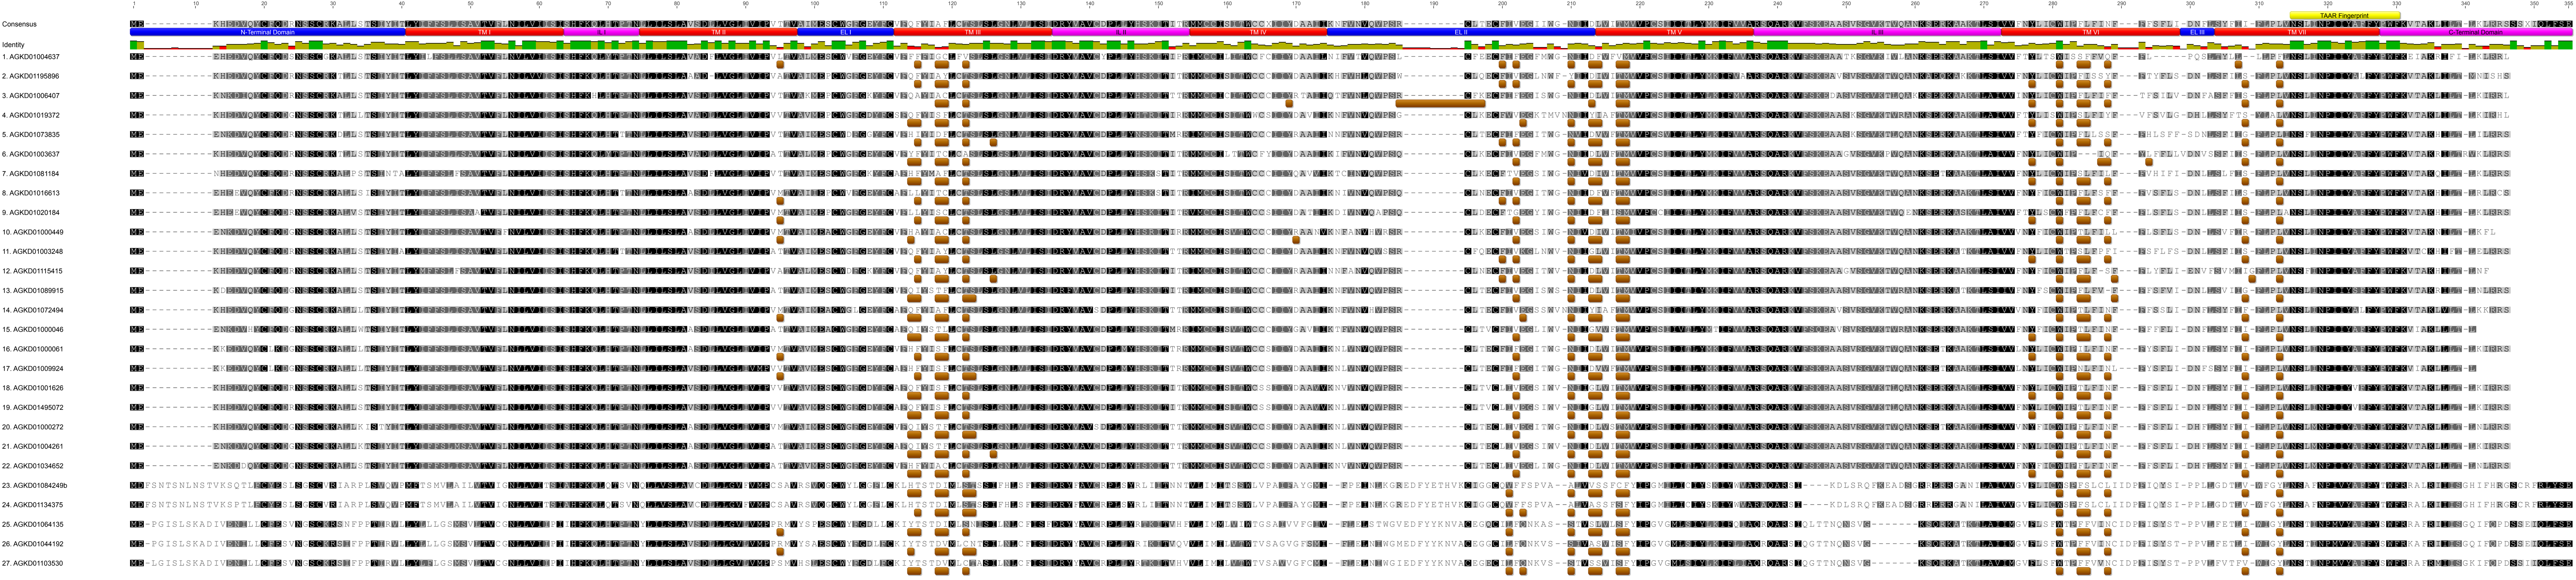

Supplement: supp_g3.114.010660_FigureS1.pdf [file supp_g3.114.010660_FigureS1.pdf]
