# Supplementary material for: Genomic Organization and Evolution of the Trace Amine-Associated Receptor (TAAR) Repertoire in Atlantic Salmon (Salmo salar)
Source: PubMed Central journal article supplement (PMC4065256; doi:10.1534/g3.114.010660), 2014-04-22
Supplement: supp_g3.114.010660_TableS2.pdf [file supp_g3.114.010660_TableS2.pdf]

**Table S2** Accession numbers and genomic positions for vertebrate genes used in analyses.

| Organism                             | Gene Name          | Genomic Position       | Accession Number      | Source                |
|--------------------------------------|--------------------|------------------------|-----------------------|-----------------------|
| Chicken<br><i>Gallus gallus</i>      | Gg_TAAR1           | 3:56100482..56108943   | XM_004935740.1        | NCBI                  |
|                                      | Gg_TAAR2           | 3:56116829..56117857   | XM_003640968.1        | NCBI                  |
|                                      | Gg_TAAR5           | 3:56137725..56138753   | XM_001231564.2        | NCBI                  |
| Human<br><i>Homo sapiens</i>         | Hs_TAAR6           | 6:132891461..132892498 | NM_175067.1           | NCBI                  |
|                                      | Hs_TAAR1           | 6:132966123..132967142 | NM_138327             | NCBI                  |
|                                      | Hs_TAAR2v1         | 6:132938289..132945414 | NM_001033080.1        | NCBI                  |
|                                      | Hs_TAAR2v2         | 6:132938289..132945414 | NM_014626.3           | NCBI                  |
|                                      | Hs_TAAR5           | 6:132909731..132910877 | NM_003967.2           | NCBI                  |
|                                      | Hs_TAAR8           | 6:132873832..132874860 | NM_053278.1           | NCBI                  |
|                                      | Hs_TAAR9           | 6:132859427..132860475 | NM_175057.3           | NCBI                  |
| Lamprey<br><i>Petromyzon marinus</i> | STIG_44993.TAAR325 |                        |                       | Libants et al. (2009) |
|                                      | STIG_38630.TAAR335 |                        |                       | Libants et al. (2009) |
|                                      | STIG_28657.TAAR352 |                        |                       | Libants et al. (2009) |
|                                      | STIG_22166.TAAR354 |                        |                       | Libants et al. (2009) |
|                                      | STIG_17331.TAAR351 |                        |                       | Libants et al. (2009) |
|                                      | STIG_16230.TAAR353 |                        |                       | Libants et al. (2009) |
|                                      | STIG_15712.TAAR345 |                        |                       | Libants et al. (2009) |
|                                      | STIG_15153.TAAR369 |                        |                       | Libants et al. (2009) |
|                                      | STIG_15153.TAAR353 |                        |                       | Libants et al. (2009) |
|                                      | STIG_14718.TAAR353 |                        |                       | Libants et al. (2009) |
|                                      | STIG_14718.TAAR345 |                        |                       | Libants et al. (2009) |
|                                      | STIG_14409.TAAR352 |                        |                       | Libants et al. (2009) |
|                                      | STIG_12707.TAAR348 |                        |                       | Libants et al. (2009) |
|                                      | STIG_9755.TAAR355B |                        |                       | Libants et al. (2009) |
|                                      | STIG_9755.TAAR355A |                        |                       | Libants et al. (2009) |
|                                      | STIG_9665.TAAR351  |                        |                       | Libants et al. (2009) |
|                                      | STIG_7446.TAAR346  |                        |                       | Libants et al. (2009) |
|                                      | STIG_6636.TAAR354  |                        |                       | Libants et al. (2009) |
|                                      | STIG_5267.TAAR362  |                        |                       | Libants et al. (2009) |
|                                      | STIG_3721.TAAR365  |                        |                       | Libants et al. (2009) |
|                                      | STIG_3721.TAAR351B |                        |                       | Libants et al. (2009) |
|                                      | STIG_3721.TAAR351A |                        |                       | Libants et al. (2009) |
|                                      | STIG_2594.TAAR358  |                        |                       | Libants et al. (2009) |
| STIG_2594.TAAR349                    |                    |                        | Libants et al. (2009) |                       |
| STIG_2594.TAAR340                    |                    |                        | Libants et al. (2009) |                       |
| STIG_1853.TAAR349B                   |                    |                        | Libants et al. (2009) |                       |
| STIG_1853.TAAR349A                   |                    |                        | Libants et al. (2009) |                       |
| Mouse<br><i>Mus musculus</i>         | Mm_TAAR1           | 10:23920406..23921404  | NM_053205.1           | NCBI                  |
|                                      | Mm_TAAR2           | 10:23938572..23941583  | NM_001007266.1        | NCBI                  |

|                                          |                              |                               |                 |      |
|------------------------------------------|------------------------------|-------------------------------|-----------------|------|
|                                          | Mm_TAAR3                     | 10:23949558..23950589         | NM_001008429.1  | NCBI |
|                                          | Mm_TAAR4                     | 10:23960494..23961537         | NM_001008499.1  | NCBI |
|                                          | Mm_TAAR5                     | 10:23970706..23971719         | NM_001009574.1  | NCBI |
|                                          | Mm_TAAR6                     | 10:23984609..23985646         | NM_001010828.1  | NCBI |
|                                          | Mm_TAAR7a                    | 10:23992405..23993481         | NM_001010829.1  | NCBI |
|                                          | Mm_TAAR7b                    | 10:23999939..24001015         | NM_001010827.1  | NCBI |
|                                          | Mm_TAAR7d                    | 10:24027222..24028298         | NM_001010838.1  | NCBI |
|                                          | Mm_TAAR7e                    | 10:24037614..24038690         | NM_001010835.1  | NCBI |
|                                          | Mm_TAAR7f                    | 10:24049510..24050586         | NM_001010839.1  | NCBI |
|                                          | Mm_TAAR8a                    | 10:24076500..24077534         | NM_001010830.1  | NCBI |
|                                          | Mm_TAAR8b                    | 10:24091260..24092294         | NM_001010837.1  | NCBI |
|                                          | Mm_TAAR8c                    | 10:24100843..24101951         | NM_001010840.2  | NCBI |
|                                          | Mm_TAAR9                     | 10:24108488..24109534         | NM_001010831.1  | NCBI |
| <b>Fugu</b><br><i>Takifugu rubripes</i>  | Tr_TAAR1-like LOC101065853   | scaffold_144:4873..5868       | XM_003976993.1  | NCBI |
|                                          | Tr_TAAR1-like LOC101068509   | scaffold_2286:2698:3676       | NW_004072942.1  | NCBI |
|                                          | Tr_TAAR1-like LOC101075198   | scaffold_229:4033..5025       | XM_003977307.1  | NCBI |
|                                          | Tr_TAAR1-like LOC101075670   | 8:5604511..5605530            | XM_003966556.1  | NCBI |
|                                          | Tr_TAAR1-like LOC101076453   | scaffold_682:7142..8143       | XM003976898.1   | NCBI |
|                                          | Tr_TAAR1-like LOC101076685   | scaffold_682:15010..15984     | XM_003976899.1  | NCBI |
| <b>Medaka</b><br><i>Oryzias latipes</i>  | Ol_TAAR 7e-like LOC101169023 | 2:26340511..26341482          | XM_004066738.1  | NCBI |
|                                          | Ol_TAAR 1-like LOC101174969  | 24:10154632..10155600         | XM_004083634.1  | NCBI |
|                                          | Ol_TAAR 1-like LOC101174242  | 24:10050386..10051363         | XM_004083631.1  | NCBI |
|                                          | Ol_TAAR1-like LOC101163058   | Un:2521..3516                 | XM_004085890.1  | NCBI |
|                                          | Ol_TAAR 1-like LOC101175700  | 24:10183943..10184941         | XM_0040083637.1 | NCBI |
|                                          | Ol_TAAR 1-like LOC101175452  | 24:10173586..10174675         | NC_019882.1     | NCBI |
| <b>Frog</b><br><i>Xenopus tropicalis</i> | Xt_TAAR1                     | scaffold_5:56592878..56593941 | XM_002935811.2  | NCBI |
|                                          | Xt_TAAR4-like LOC100497949   | scaffold_5:61512858..61513896 | NW_004668237.1  | NCBI |
|                                          | Xt_TAAR4-like LOC100488258   | scaffold_5:56562660..56563662 | NW_004668237.1  | NCBI |
|                                          | Xt_TAAR4-like LOC100487949   | scaffold_5:56584949..56585950 | XM_002935812.2  | NCBI |
|                                          | Xt_TAAR4-like LOC100488107   | scaffold_2751:3356..4363      | XM_002935813.1  | NCBI |
|                                          | Xt_TAAR4-like LOC100485003   | scaffold_5:56571031..56572038 | XM004914870.1   | NCBI |
| <b>Zebrafish</b><br><i>Danio rerio</i>   | Dr_TAAR1b                    | 20:46197103..46198102         | NM_001082904.1  | NCBI |
|                                          | Dr_TAAR10a                   | 20:46166706..46167717         | NM_001082898.1  | NCBI |
|                                          | Dr_TAAR10b                   | 20:46187583..46188593         | NM_001082903.1  | NCBI |
|                                          | Dr_TAAR10c                   | 20:46170540..46171551         | NM_001082900.1  | NCBI |
|                                          | Dr_TAAR10d                   | 20:46178797..46179975         | NM_001082902    | NCBI |
|                                          | Dr_TAAR11                    | 20:46192811..46193795         | NM_001083077.1  | NCBI |
|                                          | Dr_TAAR12a                   | 20:46239853..46240885         | NM_001083109.1  | NCBI |
|                                          | Dr_TAAR12b                   | 20:46224045..46225059         | NM_001083104.1  | NCBI |
|                                          | Dr_TAAR12c                   | 20:46220574..46221591         | NM_001083095.1  | NCBI |
|                                          | Dr_TAAR12e                   | 20:46264043..46265058         | NM_001083094.1  | NCBI |

|            |                       |                |      |
|------------|-----------------------|----------------|------|
| Dr_TAAR12f | 20:46250999..46252013 | NM_001082907.1 | NCBI |
| Dr_TAAR12g | 20:46256084..46257095 | NM_001082908.1 | NCBI |
| Dr_TAAR12h | 20:46271973..46273008 | NM_001082909.1 | NCBI |
| Dr_TAAR12i | 20:46211225..46212248 | NM_001083085.1 | NCBI |
| Dr_TAAR12j | 20:46278935..46279958 | NM_001082911.1 | NCBI |
| Dr_TAAR13b | 20:46141163..46142188 | NM_001083042.1 | NCBI |
| Dr_TAAR13c | 20:46122478..46123505 | NM_001083040.1 | NCBI |
| Dr_TAAR13d | 20:46133038..46134063 | NM_001083041.1 | NCBI |
| Dr_TAAR13e | 20:46152019..46153044 | NM_001083043.1 | NCBI |
| Dr_TAAR14a | 20:46087730..46088693 | NM_001083036.1 | NCBI |
| Dr_TAAR14b | 20:46555069..46556055 | NM_001082884.1 | NCBI |
| Dr_TAAR14d | 20:46542282..46543268 | NM_001082912.1 | NCBI |
| Dr_TAAR14e | 20:46520053..46521039 | NM_001082914.1 | NCBI |
| Dr_TAAR14f | 20:46537214..46538200 | NM_001082913.1 | NCBI |
| Dr_TAAR14h | 20:46073613..46074577 | NM_001083093.1 | NCBI |
| Dr_TAAR14i | 20:46069677..46070637 | NM_001083037.1 | NCBI |
| Dr_TAAR14j | 20:46064040..46065004 | NM_001083076.1 | NCBI |
| Dr_TAAR14l | 20:46079286..46080243 | NM_001083103.1 | NCBI |
| Dr_TAAR15  | 20:46117709..46118695 | NM_001083039.1 | NCBI |
| Dr_TAAR16a | 10:41959548..41960522 | NC_007121.5    | NCBI |
| Dr_TAAR16f | 10:41977904..41978899 | NC_007121.5    | NCBI |
| Dr_TAAR16g | 10:41982677..41983672 | NC_007121.5    | NCBI |
| Dr_TAAR17a | 10:41964902..41965909 | XM_002663646.2 | NCBI |
| Dr_TAAR18a | 10:41889815..41890881 | XM_001921119.3 | NCBI |
| Dr_TAAR18c | 10:41918143..41919165 | XM_002663638.2 | NCBI |
| Dr_TAAR18d | 10:41897228..41898286 | NC_007121.5    | NCBI |
| Dr_TAAR18g | 10:41894347..41895340 | NC_007121.5    | NCBI |
| Dr_TAAR18h | 10:41927773..41929222 | XM_002663640.3 | NCBI |
| Dr_TAAR18i | 10:41934817..41935885 | NC_007121.5    | NCBI |
| Dr_TAAR18j | 10:41950041..41951072 | XM_002663643.2 | NCBI |
| Dr_TAAR19a | 10:42103621..42104682 | NC_007121.5    | NCBI |
| Dr_TAAR19b | 10:42140351..42141356 | NC_007121.5    | NCBI |
| Dr_TAAR19c | 10:42147157..42148218 | NC_007121.5    | NCBI |
| Dr_TAAR19d | 10:42134308..42135369 | XM_001921481.1 | NCBI |
| Dr_TAAR19e | 10:42108791..42109853 | NC_007121.5    | NCBI |
| Dr_TAAR19h | 10:42050839..42051900 | NC_007121.5    | NCBI |
| Dr_TAAR19i | 10:42097939..42099000 | NC_007121.5    | NCBI |
| Dr_TAAR19j | 10:42092480..42093541 | NC_007121.5    | NCBI |
| Dr_TAAR19m | 10:42056442..42057541 | XM_001342973.2 | NCBI |
| Dr_TAAR19n | 10:42066521..42067570 | NC_007121.5    | NCBI |
| Dr_TAAR19o | 10:42043558..42044629 | NC_007121.5    | NCBI |

|                             |                       |                |      |
|-----------------------------|-----------------------|----------------|------|
| Dr_TAAR19p                  | 10:42036952..42038710 | NM_001199914.1 | NCBI |
| Dr_TAAR19q                  | 10:42088337..42089398 | NC_007121.5    | NCBI |
| Dr_TAAR19s                  | 10:42012869..42013930 | NC_007121.5    | NCBI |
| Dr_TAAR19t                  | 10:42008622..42009707 | NC_007121.5    | NCBI |
| Dr_TAAR19u                  | 10:42031263..42032312 | NC_007121.5    | NCBI |
| Dr_TAAR1-like LOC100535889  | Un:6229..7240         | NW_003336689.1 | NCBI |
| Dr_TAAR20a                  | 10:41698366..41699456 | XM_001920656.2 | NCBI |
| Dr_TAAR20a1                 | 10:41839705..41840724 | XM_002663628.2 | NCBI |
| Dr_TAAR20b                  | 10:41704278..41705383 | XM_001920673.2 | NCBI |
| Dr_TAAR20b1                 | 10:41827971..41829023 | NC_007121.5    | NCBI |
| Dr_TAAR20c                  | Un:42..1040           | BC107613.1     | NCBI |
| Dr_TAAR20c1                 | 10:41747212..41748268 | NC_007121.5    | NCBI |
| Dr_TAAR20d1                 | 10:41845015..41846010 | XM_002663629.2 | NCBI |
| Dr_TAAR20f                  | 10:41717303..41718355 | NC_007121.5    | NCBI |
| Dr_TAAR20g                  | 10:41725305..41748271 | NC_007121.5    | NCBI |
| Dr_TAAR20h                  | 10:41713185..41714183 | XM_001341553.2 | NCBI |
| Dr_TAAR20i                  | 10:41731447..41732457 | XM_001920721.2 | NCBI |
| Dr_TAAR20n                  | 10:41775937..41776989 | NC_007121.5    | NCBI |
| Dr_TAAR20o                  | 10:41819593..41820646 | NC_007121.5    | NCBI |
| Dr_TAAR20r                  | 10:41790993..41792046 | NC_007121.5    | NCBI |
| Dr_TAAR20u                  | 10:41762407..41763433 | XM_001920788.2 | NCBI |
| Dr_TAAR20v                  | 10:41808799..41809851 | NC_007121.5    | NCBI |
| Dr_TAAR20z                  | 10:41849611..41850663 | NC_007121.5    | NCBI |
| Dr_TAAR32                   | 10:41995697..41996758 | NC_007121.5    | NCBI |
| Dr_TAAR4-like LOC100150578  | 15:2040432..2041457   | XM_001920809.1 | NCBI |
| Dr_TAAR64                   | 20:46148101..46149128 | NM_001083102.1 | NCBI |
| Dr_TAAR6-like LOC100002481  | 10:41834498..41835523 | XM_001342220.1 | NCBI |
| Dr_TAAR6-like LOC100002609  | 10:41902807..41903800 | NC_007121.5    | NCBI |
| Dr_TAAR6-like LOC100147966  | 10:42018541..42019952 | NC_007121.5    | NCBI |
| Dr_TAAR6-like LOC100147986  | 10:41790674..41791673 | NC_007121.5    | NCBI |
| Dr_TAAR9-like LOC101887086  | 10:41813764..41814763 | NC_007121.5    | NCBI |
| Dr_TAAR6-like LOC100150393  | 10:41856629..41857625 | NC_007121.5    | NCBI |
| Dr_TAAR6-like LOC100151046  | 10:42024091..42025099 | NC_007121.5    | NCBI |
| Dr_TAAR6-like LOC100330759  | 10:41910376..41911369 | NC_007121.5    | NCBI |
| Dr_TAAR6-like LOC100332495  | 13:305976..306950     | NC_007124.5    | NCBI |
| Dr_TAAR7a-like LOC100150419 | 20:46084062..46085048 | NC_007131.5    | NCBI |
| Dr_TAAR7c-like LOC100331259 | 10:41954907..41955899 | NC_007121.5    | NCBI |
| Dr_TAAR7d-like LOC100537518 | 10:42026878..42027874 | NC_007121.5    | NCBI |
| Dr_TAAR9-like LOC100151309  | 10:41879380..41880718 | XM_002663633.2 | NCBI |
| Dr_TAAR3-like LOC100331742  | Un:10804..11790       | NW_003336289.1 | NCBI |
| Dr_TAAR2-like               | 20:Un:4860..5573      | XM_001923755.4 | NCBI |

|                                   |                             |                           |                     |         |
|-----------------------------------|-----------------------------|---------------------------|---------------------|---------|
|                                   | Dr_TAAR20t                  | 10:41767963..41769009     | XM_002663626.3      | NCBI    |
|                                   | Dr_TAAR20l                  | 10:41771445..41772441     | XM_005155417.1      | NCBI    |
|                                   | Dr_TAAR1-like LOC100148217  | 10:41873631..41874632     | NC_007121.5         | NCBI    |
|                                   | TAAR 6-like LOC100148961    | 10:41868500..41869496     | XM_001921070.3      | NCBI    |
|                                   | Dr_TAAR20j                  | 10:41781192..41782185     | XM_002663627.2      | NCBI    |
|                                   | TAAR 6-like LOC100149676    | 10:41864180..41865170     | NC_007121.5         | NCBI    |
|                                   | Dr_TAAR18b                  | 10:41922296..41923295     | XM_002663639.2      | NCBI    |
|                                   | TAAR 9-like LOC100148476    | 10:41973844..41974831     | NC_007121.5         | NCBI    |
|                                   | Dr_TAAR6-like LOC100332366  | 13:295967..296969         | NC_007124.5         | NCBI    |
|                                   | Dr_TAAR9-like LOC100000110  | 13:300938..301940         | NC_007124.5         | NCBI    |
| <b>Tetraodon</b>                  | Tn_TAAR1(6 of 15)           | Un:85474851..85475831     | ENSTNIT00000003225  | Ensembl |
| <i>Tetraodon nigroviridis</i>     | Tn_TAAR1(11 of 15)          | Un:85467788..85468786     | ENSTNIT00000002494  | Ensembl |
|                                   | Tn_TAAR1(14 of 15)          | Un:35318087..35319082     | ENSTNIT00000001436  | Ensembl |
|                                   | Tn_TAAR1(13 of 15)          | Un:70258269..70259261     | ENSTNIT00000007318  | Ensembl |
|                                   | Tn_TAAR1(15 of 15)          | Un:70265697..70266692     | ENSTNIT00000007319  | Ensembl |
|                                   | Tn_TAAR1(10 of 15)          | Un: 85499769..85500764    | ENSTNIT00000008083  | Ensembl |
|                                   | Tn_TAAR1(12 of 15)          | 14:1075051..1076047       | ENSTNIG00000001506  | Ensembl |
|                                   | Tn_TAAR1(5 of 15)           | 14:1025315..1026317       | ENSTNIG000000019179 | Ensembl |
|                                   | Tn_TAAR1(2 of 15)           | 14:1062370..1063270       | ENSTNIG00000001657  | Ensembl |
|                                   | Tn_TAAR1(3 of 15)           | 14:1072819..1073800       | ENSTNIG00000001360  | Ensembl |
|                                   | Tn_TAAR1(9 of 15)           | Un:85495812..85496808     | ENSTNIG00000005193  | Ensembl |
| <b>Stickleback</b>                | Ga_TAAR1(2 of 5)            | groupXVIII:864898..865894 | ENSGACG00000004284  | Ensembl |
| <i>Gasterosteus aculeatus</i>     | Ga_TAAR1(5 of 5)            | groupXVIII:849379..850381 | ENSGACG00000004279  | Ensembl |
|                                   | Ga_TAAR1(1 of 5)            | groupXVIII:856337..857339 | ENSGACG00000004280  | Ensembl |
|                                   | Ga_TAAR1(4 of 5)            | groupXVIII:806425..807427 | ENSGACG00000004274  | Ensembl |
|                                   | Ga_TAAR1(3 of 5)            | groupI:27258528..2725921  | ENSGACG000000015361 | Ensembl |
| <b>Anole Lizard</b>               | Ac_TAAR1                    | Un:4463430..4464437       | XM_003223314.1      | NCBI    |
| <i>Anolis carolinensis</i>        | Ac_TAAR2                    | Un:4474066..4475097       | XM_003223315.1      | NCBI    |
|                                   | Ac_TAAR5                    | Un:4484212..4485264       | XM_003223316.1      | NCBI    |
| <b>American Alligator</b>         | Am_TAAR1                    | Un:220473..221480         | XM_006270537.1      | NCBI    |
| <i>Alligator mississippiensis</i> | Am_TAAR2                    | 245497..246489            | XM_006270538.1      | NCBI    |
|                                   | Am_TAAR4-like LOC102559019  | 286493..287536            | XM_006270529.1      | NCBI    |
|                                   | Am_TAAR4-like LOC102558785  | 269855..270901            | XM_006270528.1      | NCBI    |
|                                   | Am_TAAR5-like LOC102561336  | 297408..298403            | XM_006270539.1      | NCBI    |
|                                   | Am_TAAR7a-like LOC102561788 | 335295..336326            | XM_006270540.1      | NCBI    |
|                                   | Am_TAAR9-like LOC102562260  | 358195..359220            | XM_006270542.1      | NCBI    |
|                                   | Am_TAAR9-like LOC102559257  | 305709..306737            | XM_006270530.1      | NCBI    |
| <b>African Coelacanth</b>         | Lc_TAAR4-like LOC102365654  | Un:7900..8919             | XM_006014231.1      | NCBI    |
| <i>Latimeria chalumnae</i>        | Lc_TAAR4-like LOC102362127  | Un:6731..7825             | XM_006014219.1      | NCBI    |
|                                   | Lc_TAAR9-like LOC102346275  | Un:226..1260              | XM_006014034.1      | NCBI    |
|                                   | Lc_TAAR4-like LOC102346012  | Un:4621..5655             | XM_006014033.1      | NCBI    |

|                            |                                   |                   |                |               |
|----------------------------|-----------------------------------|-------------------|----------------|---------------|
|                            | Lc_TAAR4-like LOC102362844        | Un:16272..17312   | XM_006014013.1 | NCBI          |
|                            | Lc_TAAR4-like LOC102358308        | Un:34650..35687   | XM_006013795.1 | NCBI          |
|                            | Lc_TAAR4-like LOC102346983        | Un:43349..44395   | XM_006013765.1 | NCBI          |
|                            | Lc_TAAR4-like LOC102362653        | Un:81244..82287   | XM_006013513.1 | NCBI          |
|                            | Lc_TAAR5-like LOC102362390        | Un:53536..54543   | XM_006013512.1 | NCBI          |
|                            | Lc_TAAR4-like LOC102361509        | Un:24914..25954   | XM_006013443.1 | NCBI          |
|                            | Lc_TAAR4-like LOC102358939        | Un:98526..99563   | XM_006013436.1 | NCBI          |
|                            | Lc_TAAR4-like LOC102367115        | Un:100058..101794 | XM_006013007.1 | NCBI          |
|                            | Lc_TAAR4-like LOC102366851        | Un:54232..56373   | XM_006013006.1 | NCBI          |
|                            | Lc_TAAR4-like LOC102366590        | Un:17939..19252   | XM_006013005.1 | NCBI          |
|                            | Lc_TAAR4-like LOC102364694        | Un:107680..108717 | XM_006012998.1 | NCBI          |
|                            | Lc_TAAR5-like LOC102348717        | Un:134193..135206 | XM_006011945.1 | NCBI          |
|                            | Lc_TAAR5-like LOC102348210        | Un:47880..48881   | XM_006011943.1 | NCBI          |
|                            | Lc_TAAR1-like LOC102360536        | Un:202003..203031 | XM_006010896.1 | NCBI          |
| <b>Elephant Shark</b>      | Cm_contig_19181 - ORF 1 (frame 3) | Un:6852..7886     | AAVX02019181.1 | NCBI          |
| <i>Callorhinchus milii</i> | Cm_contig_19181 - ORF 4 (frame 1) | Un:46282..47310   | AAVX02019181.1 | NCBI          |
| <b>Atlantic Salmon</b>     |                                   | 21359..22306      | AGKD01000046   | ASalBase/NCBI |
| <i>Salmo salar</i>         |                                   | 16565..17527      | AGKD01000061   | ASalBase/NCBI |
|                            |                                   | 35874..36836      | AGKD01000272   | ASalBase/NCBI |
|                            |                                   | 6099..7052        | AGKD01000449   | ASalBase/NCBI |
|                            |                                   | 2040..3002        | AGKD01001626   | ASalBase/NCBI |
|                            |                                   | 16596..17558      | AGKD01003248   | ASalBase/NCBI |
|                            |                                   | 13148..14107      | AGKD01003637   | ASalBase/NCBI |
|                            |                                   | 9633..10595       | AGKD01004261   | ASalBase/NCBI |
|                            |                                   | 12524..13471      | AGKD01004637   | ASalBase/NCBI |
|                            |                                   | 7621..8583        | AGKD01006407   | ASalBase/NCBI |
|                            |                                   | 8332..9279        | AGKD01009924   | ASalBase/NCBI |
|                            |                                   | 9151..10113       | AGKD01016613   | ASalBase/NCBI |
|                            |                                   | 3006..3971        | AGKD01019372   | ASalBase/NCBI |
|                            |                                   | 15867..16829      | AGKD01020184   | ASalBase/NCBI |
|                            |                                   | 10125..11087      | AGKD01034652   | ASalBase/NCBI |
|                            |                                   | 859..1890         | AGKD01044192   | ASalBase/NCBI |
|                            |                                   | 796..1821         | AGKD01064135   | ASalBase/NCBI |
|                            |                                   | 1778..2743        | AGKD01072494   | ASalBase/NCBI |
|                            |                                   | 2586..3548        | AGKD01073835   | ASalBase/NCBI |
|                            |                                   | 3202..4164        | AGKD01081184   | ASalBase/NCBI |
|                            |                                   | 1874..2911        | AGKD01084249b  | ASalBase/NCBI |
|                            |                                   | 2433..3392        | AGKD01089915   | ASalBase/NCBI |
|                            |                                   | 2628..3659        | AGKD01103530   | ASalBase/NCBI |
|                            |                                   | 5286..6239        | AGKD01115415   | ASalBase/NCBI |
|                            |                                   | 717..1823         | AGKD01134375   | ASalBase/NCBI |
|                            |                                   | 9267..10224       | AGKD01195896*  | ASalBase/NCBI |

|                  |                                | 731..1693              | AGKD01495072   | ASaIBase/NCBI |
|------------------|--------------------------------|------------------------|----------------|---------------|
| <b>OUTGROUPS</b> | Dr_Histamine Receptor H2       | 14:1618017..1619248    | NM_001045338.1 | NCBI          |
|                  | Hs_Histamine Receptor H2       | 5:175084847..175136239 | NM_001131055.1 | NCBI          |
|                  | Hs_Rhodopsin                   | 3:129247482..129254187 | NM_000539.3    | NCBI          |
|                  | Dr_Adrenergic Receptor Beta 3a | 8:38812340..38850902   | NM_001128335.1 | NCBI          |
|                  | Hs_Adrenergic Receptor Beta 3  | 8:37820513..37824184   | NM_000025.2    | NCBI          |
|                  | Gg_Histamine Receptor H2       | 13:9783231..9794177    | XM_004944905.1 | NCBI          |
|                  | Dr_Dopamine receptor D2a       | 15:21008238..21035946  | NM_183068.1    | NCBI          |
|                  | Hs_Dopamine receptor D2        | 11:5001..70685         | NM_000795.3    | NCBI          |
|                  | Gg_Dopamine receptor D2        | 24:5748287..5753356    | NM_001113290.1 | NCBI          |
|                  | Dr_Serotonin receptor 1A b     | 21:19778036..19779277  | NM_001145766.1 | NCBI          |
|                  | Hs_Serotonin receptor 1A       | 5:63255560..63257804   | NM_000524.3    | NCBI          |
|                  | Gg_Serotonin receptor 1A       | Z:19853067..19854401   | NM_001170528.1 | NCBI          |

\*Contig with partial sequence. Complete TAAR was found in scaffold jcf2339333987\_2792921-4584714\_ssa21 (Lien et al., in preparation), which contains this contig
