# Supplementary material for: Genomic Organization and Evolution of the Trace Amine-Associated Receptor (TAAR) Repertoire in Atlantic Salmon (Salmo salar)
Source: PubMed Central journal article supplement (PMC4065256; doi:10.1534/g3.114.010660), 2014-04-22
Supplement: supp_g3.114.010660_TableS3.pdf [file supp_g3.114.010660_TableS3.pdf]

**Table S3 Summary of putatively functional Atlantic salmon TAAR genes including predicted nucleotide length and physical/genetic location.** Superscripts denote the various mapping methods utilized.

| Contig        | Length (bp) | Physical Location    | Genetic Location     |
|---------------|-------------|----------------------|----------------------|
| AGKD01000046  | 948         | unmapped             | unmapped             |
| AGKD01000061  | 963         | unmapped             | unmapped             |
| AGKD01000272  | 963         | unmapped             | unmapped             |
| AGKD01000449  | 954         | unmapped             | unmapped             |
| AGKD01001626  | 963         | fps943 <sup>1</sup>  | Ssa21 <sup>1,2</sup> |
| AGKD01003248  | 963         | fps508 <sup>1</sup>  | Ssa21 <sup>1</sup>   |
| AGKD01003637  | 960         | fps508 <sup>1</sup>  | Ssa21 <sup>1,2</sup> |
| AGKD01004261  | 963         | unmapped             | unmapped             |
| AGKD01004637  | 948         | unmapped             | Ssa13 <sup>2,3</sup> |
| AGKD01006407  | 963         | unmapped             | Ssa21 <sup>2</sup>   |
| AGKD01009924  | 948         | unmapped             | unmapped             |
| AGKD01016613  | 963         | fps508 <sup>1</sup>  | Ssa21 <sup>1,2</sup> |
| AGKD01019372  | 966         | unmapped             | Ssa21 <sup>2</sup>   |
| AGKD01020184  | 963         | fps508 <sup>1</sup>  | Ssa21 <sup>1,2</sup> |
| AGKD01034652  | 963         | unmapped             | unmapped             |
| AGKD01044192  | 1026        | fps2319 <sup>1</sup> | Ssa06 <sup>1,3</sup> |
| AGKD01064135  | 1026        | unmapped             | unmapped             |
| AGKD01072494  | 966         | unmapped             | Ssa02 <sup>2</sup>   |
| AGKD01073835  | 963         | fps943 <sup>1</sup>  | Ssa21 <sup>1,3</sup> |
| AGKD01081184  | 963         | fps508 <sup>1</sup>  | Ssa21 <sup>1,2</sup> |
| AGKD01084249b | 1038        | fps798 <sup>1</sup>  | Ssa15 <sup>1,2</sup> |
| AGKD01089915  | 960         | fps943 <sup>1</sup>  | Ssa21 <sup>1,3</sup> |
| AGKD01103530  | 1026        | unmapped             | unmapped             |
| AGKD01115415  | 954         | fps508 <sup>1</sup>  | Ssa21 <sup>1,2</sup> |
| AGKD01134375  | 1038        | fps798 <sup>1</sup>  | Ssa15 <sup>1,2</sup> |
| AGKD01195896  | 957         | fps508 <sup>1</sup>  | Ssa21 <sup>1</sup>   |
| AGKD01495072  | 963         | unmapped             | Unmapped             |

<sup>1</sup> BLASTn against BAC ends

<sup>2</sup> BLASTn against SNP mapped

<sup>3</sup> Microsatellite marker
