# Supplementary material for: Genomic Organization and Evolution of the Trace Amine-Associated Receptor (TAAR) Repertoire in Atlantic Salmon (Salmo salar)
Source: PubMed Central journal article supplement (PMC4065256; doi:10.1534/g3.114.010660), 2014-04-22
Supplement: supp_g3.114.010660_TableS4.pdf [file supp_g3.114.010660_TableS4.pdf]

**Table S4 Summary of putative Atlantic salmon TAAR pseudogenes including physical/genetic location and predicted cause of pseudogenization.** Superscripts denote the various mapping methods utilized.

| Name          | Physical Location   | Genetic Location     | Predicted Cause                         |
|---------------|---------------------|----------------------|-----------------------------------------|
| AGKD01001951  | fps508 <sup>1</sup> | Ssa21 <sup>1,2</sup> | Indel / Frameshift Mutation             |
| AGKD01036711  | fps508 <sup>1</sup> | Ssa21 <sup>1,2</sup> | Indel / Frameshift Mutation             |
| AGKD01087949  | fps508 <sup>1</sup> | Ssa21 <sup>1,2</sup> | Partial match                           |
| AGKD01040598  | fps798 <sup>1</sup> | Ssa15 <sup>1,2</sup> | Partial match                           |
| AGKD01084249a | fps798 <sup>1</sup> | Ssa15 <sup>1,2</sup> | Partial match                           |
| AGKD01222984  | fps798 <sup>1</sup> | Ssa15 <sup>1,2</sup> | Nonsense mutation                       |
| AGKD01000376  | unmapped            | unmapped             | Indel / Frameshift Mutation             |
| AGKD01014617  | unmapped            | Ssa21 <sup>2,3</sup> | Indel / Frameshift Mutation             |
| AGKD01024914  | unmapped            | unmapped             | Partial Match                           |
| AGKD01052335  | unmapped            | unmapped             | Nonsense Mutation                       |
| AGKD01073505  | unmapped            | Ssa14 <sup>3</sup>   | Indel / Frameshift Mutation             |
| AGKD01074920  | unmapped            | Ssa21 <sup>2</sup>   | Nonsense Mutation                       |
| AGKD01084072  | unmapped            | Ssa21 <sup>2</sup>   | Indel / Frameshift Mutation             |
| AGKD01085575  | unmapped            | unmapped             | Indel / Frameshift Mutation             |
| AGKD01102951  | unmapped            | unmapped             | more sequence data required             |
| AGKD01137574  | unmapped            | Ssa06 <sup>2</sup>   | Partial Match                           |
| AGKD01143659  | unmapped            | unmapped             | more sequence data required             |
| AGKD01145155  | unmapped            | unmapped             | more sequence data required             |
| AGKD01162248  | unmapped            | Ssa04 <sup>2</sup>   | Partial Match                           |
| AGKD01165582  | unmapped            | unmapped             | Frameshift Mutation / Nonsense Mutation |
| AGKD01284261  | unmapped            | Ssa01 <sup>2</sup>   | Partial Match                           |
| AGKD01437520  | unmapped            | Ssa21 <sup>2</sup>   | more sequence data required             |
| AGKD01455862  | unmapped            | Ssa21 <sup>2</sup>   | Indel / Frameshift Mutation             |
| AGKD01503373  | unmapped            | unmapped             | more sequence data required             |
| AGKD01507155  | unmapped            | unmapped             | Partial Match                           |

<sup>1</sup> BLASTn against BAC ends

<sup>2</sup> BLASTn against SNP mapped

<sup>3</sup> Microsatellite marker
